# Supplementary material for: Endoglycan plays a role in axon guidance by modulating cell adhesion
Source: eLife. 2021 Mar 2;10:e64767. doi: 10.7554/eLife.64767 (PMC7946425; doi:10.7554/eLife.64767)
Supplement: Figure 2—figure supplement 3—source data 1. [file elife-64767-fig2-figsupp3-data1.xlsx]

## Sheet: Figure 2-figure supplement 3C
			dsEndo					GFP only
			Embryo number	untreated side	eletroporated side	ratio untreated/electroporated side		Embryo number	untreated side	eletroporated side	ratio untreated/electroporated side
			1249	94	58	0.617021		1181	118	117	0.991525
				158	90	0.56962			123	124	1.00813
				136	83	0.610294			128	129	1.00781
			1253	118	59	0.5		1182	117	121	1.03419
				117	60	0.512821			107	106	0.990654
				130	106	0.815385			114	116	1.01754
			1255	106	65	0.613208		1183	124	122	0.983871
				149	87	0.583893			114	118	1.03509
				120	89	0.741667			113	113	1
			average	125.333	77.4444	0.618212		average	117.556	118.444	1.00765
			stdev	20.2176	17.3429	0.101752		stdev	6.50214	6.65415	0.0184664
			SEM	6.73919	5.78098	0.0339173		SEM	2.16738	2.21805	0.00615547
			% of difference electroporated side dsEndo vs GFP	0.386479
			N(embryos)=	3				N(embryos)=	3
			Statistics (done with Graphpad Prism
			Column B	dsEndo ratio unt./elec. side
			vs.	vs.
			Column A	GFP unt./elec. Side
			Unpaired t test
			P value	<0.0001
			P value summary	****
			Significantly different (P < 0.05)?	Yes
			One- or two-tailed P value?	Two-tailed
			t, df	t=11.30, df=16
			How big is the difference?
			Mean of column A	1.008
			Mean of column B	0.6182
			Difference between means (B - A) ± SEM	-0.3894 ± 0.03447
			95% confidence interval	-0.4625 to -0.3164
			R squared (eta squared)	0.8886
			F test to compare variances
			F, DFn, Dfd	30.36, 8, 8
			P value	<0.0001
			P value summary	****
			Significantly different (P < 0.05)?	Yes
			Data analyzed
			Sample size, column A	9
			Sample size, column B	9
