# Supplementary material for: Endoglycan plays a role in axon guidance by modulating cell adhesion
Source: eLife. 2021 Mar 2;10:e64767. doi: 10.7554/eLife.64767 (PMC7946425; doi:10.7554/eLife.64767)
Supplement: Figure 2—source data 1. [file elife-64767-fig2-data1.xlsx]

## Sheet: Figure 2L
			percentage of aberrant phenotype
		raw data Figure 2L	embryo n°	WT control	EGFP	dsCD34	dsPodxl	dsEndo 5'UTR	dsEndo ORF
			1	0	0	23.5	22	100	0
			2	0	28	50	57	100	55
			3	20	11	16	42	57	91
			4	25	28	0	42	100	84
			5	0	0	33	14	100	100
			6	0	0	9	33	75	66
			7	0	0	25	28	60	100
			8	0	28	40	20	100	50
			9	22	0		12.5	60	72
			10	0	0		15.5	83	6
			11		20		0	70	44
			12		11		33		44
			13		100		30		75
			14		25		0		66
			15		0		14		50
			16		25		33		45
			17		0		0		87.5
			18						75
			average	6.7	16.2353	24.5625	23.2941	82.2727	61.6944
			stdev	10.8531	24.702	16.3738	16.1556	18.4558	28.2693
			SEM	3.43204	5.99113	5.78903	3.9183	5.56465	6.66313
			count (N embryos)	10	17	8	17	11	18
		Statistics (done with Graphpad Prism)
		Number of families	1
		Number of comparisons per family	15
		Alpha	0.05
		One-way ANOVA with Tukey's multiple comparisons test	Mean Diff.	95.00% CI of diff.	Significant?	Summary	Adjusted P Value
		WT control vs. EGFP	-9.535	-34.30 to 15.23	No	ns	0.8691
		WT control vs. dsCD34	-17.86	-47.34 to 11.62	No	ns	0.4897
		WT control vs. dsPodxl	-16.59	-41.36 to 8.174	No	ns	0.3752
		WT control vs. dsEndo 5'UTR	-75.57	-102.7 to -48.42	Yes	****	<0.0001
		WT control vs. dsEndo ORF	-54.99	-79.51 to -30.48	Yes	****	<0.0001
		EGFP vs. dsCD34	-8.327	-34.97 to 18.32	No	ns	0.9418
		EGFP vs. dsPodxl	-7.059	-28.38 to 14.26	No	ns	0.9265
		EGFP vs. dsEndo 5'UTR	-66.04	-90.09 to -41.99	Yes	****	<0.0001
		EGFP vs. dsEndo ORF	-45.46	-66.48 to -24.44	Yes	****	<0.0001
		dsCD34 vs. dsPodxl	1.268	-25.38 to 27.92	No	ns	>0.9999
		dsCD34 vs. dsEndo 5'UTR	-57.71	-86.59 to -28.83	Yes	****	<0.0001
		dsCD34 vs. dsEndo ORF	-37.13	-63.54 to -10.72	Yes	**	0.0013
		dsPodxl vs. dsEndo 5'UTR	-58.98	-83.03 to -34.93	Yes	****	<0.0001
		dsPodxl vs. dsEndo ORF	-38.4	-59.42 to -17.38	Yes	****	<0.0001
		dsEndo 5'UTR vs. dsEndo ORF	20.58	-3.207 to 44.36	No	ns	0.1285
