# Supplementary material for: Endoglycan plays a role in axon guidance by modulating cell adhesion
Source: eLife. 2021 Mar 2;10:e64767. doi: 10.7554/eLife.64767 (PMC7946425; doi:10.7554/eLife.64767)
Supplement: Figure 3—source data 1. [file elife-64767-fig3-data1.xlsx]

## Sheet: Figure 3T
				HH25 average FP width [μm]
		raw data Figure 3T	embryo n°	WT control	EGFP	dsEndo
			1	81	79	54
			2	83	73	64.3333
			3	76	88	66
			4	83.3333	84.6667	48
			5	89.6667	90.0667	63.6667
			6	81.3333	86.6667	68
			7			67.3333
			average	82.3889	83.5667	61.619
			stdev	4.42928	6.40677	7.61195
			SEM	1.80825	2.61555	2.87705
			count (n embryos)	6	6	7
		statistics (done with Graphpad Prism)
		Number of families	1
		Number of comparisons per family	3
		Alpha	0.05
		one-way ANOVA with Tukey's multiple comparisons test	Mean Diff.	95.00% CI of diff.	Significant?	Summary	Adjusted P Value
		WT control vs. EGFP	-1.2	-10.71 to 8.308	No	ns	0.9434
		WT control vs. dsEndo	20.77	11.61 to 29.93	Yes	****	<0.0001
		EGFP vs. dsEndo	21.97	12.81 to 31.13	Yes	****	<0.0001
		Test details	Mean 1	Mean 2	Mean Diff.	SE of diff.	n1	n2	q	DF
		WT control vs. EGFP	82.38	83.58	-1.2	3.685	6	6	0.4605	16
		WT control vs. dsEndo	82.38	61.61	20.77	3.551	6	7	8.272	16
		EGFP vs. dsEndo	83.58	61.61	21.97	3.551	6	7	8.75	16

## Sheet: Figure 3U
				HH25 average commissure width [μm]
		raw data Figure 3U	embryo n°	WT control	EGFP	dsEndo
			1	11.39	18.4067	25.2567
			2	15.575	19.3233	19.48
			3	21.2533	17.2633	17.8333
			4	21.7233	22.4067	24.38
			5	21.1033	18.06	13.9267
			6	20.2567	18.7133	20.5567
			7			21.7833
			average	18.5503	19.0289	20.4595
			stdev	4.16957	1.79102	3.88757
			SEM	1.70222	0.731181	1.46936
			count (n embryos)	6	6	7
		statistics (done with Graphpad Prism)
		Number of families	1
		Number of comparisons per family	3
		Alpha	0.05
		One-way ANOVA with Tukey's multiple comparisons test	Mean Diff.	95.00% CI of diff.	Significant?	Summary	Adjusted P Value
		WT control vs. EGFP	-0.4789	-5.661 to 4.703	No	ns	0.9692
		WT control vs. dsEndo	-1.912	-6.906 to 3.082	No	ns	0.5947
		EGFP vs. dsEndo	-1.433	-6.427 to 3.561	No	ns	0.7435
		Test details	Mean 1	Mean 2	Mean Diff.	SE of diff.	n1	n2	q	DF
		WT control vs. EGFP	18.55	19.03	-0.4789	2.008	6	6	0.3372	16
		WT control vs. dsEndo	18.55	20.46	-1.912	1.935	6	7	1.397	16
		EGFP vs. dsEndo	19.03	20.46	-1.433	1.935	6	7	1.047	16

## Sheet: Figure 3V
				HH21 average FP width [μm]
		raw data Figure 3V	embryo n°	WT control	EGFP	dsEndo
			1	76.2	73.88	79.31
			2	62.04	71.04	63.35
			3	72.2	73.88	75.59
			4		63.5	66.01
			5			71.23
			6			68.55
			7			76.92
			8			73.72
			average	70.1467	70.575	71.835
			stdev	7.2999	4.90299	5.56095
			SEM	4.2146	2.45149	1.96609
			count (n embryos)	3	4	8
	Statistics
	dsEndo vs EGFP						dsEndo vs wt						EGFFPvs wt
	t-Test: Two-Sample Assuming Equal Variances						t-Test: Two-Sample Assuming Equal Variances						t-Test: Two-Sample Assuming Equal Variances
		Variable 1	Variable 2					Variable 1	Variable 2					Variable 1	Variable 2
	Mean	71.835	70.575				Mean	71.835	70.1467				Mean	70.575	70.1467
	Variance	30.9242	24.0393				Variance	30.9242	53.2885				Variance	24.0393	53.2885
	Observations	8	4				Observations	8	3				Observations	4	3
	Pooled Variance	28.8587					Pooled Variance	35.894					Pooled Variance	35.739
	Hypothesized Mean Difference	0					Hypothesized Mean Difference	0					Hypothesized Mean Difference	0
	df	10					df	9					df	5
	t Stat	0.383016					t Stat	0.416252					t Stat	0.0938107
	P(T<=t) one-tail	0.354862					P(T<=t) one-tail	0.343488					P(T<=t) one-tail	0.464451
	t Critical one-tail	1.81246					t Critical one-tail	1.83311					t Critical one-tail	2.01505
	P(T<=t) two-tail	0.709724					P(T<=t) two-tail	0.686977					P(T<=t) two-tail	0.928903
	t Critical two-tail	2.22814					t Critical two-tail	2.26216					t Critical two-tail	2.57058

## Sheet: Figure 3W
				HH21 average commissure width [μm]
		raw data Figure 3W	embryo n°	WT control	EGFP	dsEndo
			1	6.6	6.2	6.9
			2	8.8	9.32	7.84
			3	5.3	3.93	11.01
			4		8.25	6.71
			5			5.52
			6			7.2
			7			5.57
			8			8.4
			average	6.9	6.925	7.39375
			stdev	1.76918	2.37959	1.76776
			SEM	1.02144	1.18979	0.624997
			count (n embryos)	3	4	8
	Statistics
	dsEndo vs EGFP						dsEndo vs wt						EGFFPvs wt
	t-Test: Two-Sample Assuming Equal Variances						t-Test: Two-Sample Assuming Equal Variances						t-Test: Two-Sample Assuming Equal Variances
		Variable 1	Variable 2					Variable 1	Variable 2					Variable 1	Variable 2
	Mean	7.39375	6.925				Mean	7.39375	6.9				Mean	6.925	6.9
	Variance	3.12497	5.66243				Variance	3.12497	3.13				Variance	5.66243	3.13
	Observations	8	4				Observations	8	3				Observations	4	3
	Pooled Variance	3.88621					Pooled Variance	3.12609					Pooled Variance	4.64946
	Hypothesized Mean Difference	0					Hypothesized Mean Difference	0					Hypothesized Mean Difference	0
	df	10					df	9					df	5
	t Stat	0.388296					t Stat	0.412492					t Stat	0.0151803
	P(T<=t) one-tail	0.352968					P(T<=t) one-tail	0.344816					P(T<=t) one-tail	0.494238
	t Critical one-tail	1.81246					t Critical one-tail	1.83311					t Critical one-tail	2.01505
	P(T<=t) two-tail	0.705935					P(T<=t) two-tail	0.689631					P(T<=t) two-tail	0.988475
	t Critical two-tail	2.22814					t Critical two-tail	2.26216					t Critical two-tail	2.57058
