# Supplementary material for: Endoglycan plays a role in axon guidance by modulating cell adhesion
Source: eLife. 2021 Mar 2;10:e64767. doi: 10.7554/eLife.64767 (PMC7946425; doi:10.7554/eLife.64767)
Supplement: Figure 4—source data 1. [file elife-64767-fig4-data1.xlsx]

## Sheet: Figure 4B
dsEndo									percentage					Ipsi= ipsilateral turn
embryo n°	injection sites	Normal	Ipsi	FP	NT				Normal	Ipsi	FP	NT		FP= FP stalling
1424	4	1	0	1	2				0.25	0	0.25	0.5		NT = no turn
1429	9	2	1	0	6				0.222222	0.111111	0	0.666667
1431	5	1	0	1	3				0.2	0	0.2	0.6
1432	4	1	0	0	3				0.25	0	0	0.75			percentage of normal injection sites
1435	9	2	0	3	6				0.222222	0	0.333333	0.666667			dsEndo	EGFP	untreated	Endo OE	Hoxa1::Endo-L	Hoxa1::Endo-M	Hoxa1::Endo-H	Math1::Endo-L	Math1::Endo-M	Math1::Endo-H
1445	8	6	0	0	2				0.75	0	0	0.25			0.25	0.5	1	0.357143	0	1	0	0.714286	0.6	0.4
1453	13	1	0	8	12				0.0769231	0	0.615385	0.923077			0.222222	1	1	0.714286	1	0.25	0.1	0.714286	0.75	0.222222
1459	4	0	0	2	2				0	0	0.5	0.5			0.2	0.8	0.8	0.5	0	0.5	0.4	0.857143	0.0909091	0.375
1465	11	6	0	0	5				0.545455	0	0	0.454545			0.25	1	0.727273	0.8	0.25	0.571429	0.714286	0.777778	0.263158	0.25
1481	4	0	0	3	1				0	0	0.75	0.25			0.222222	1	0.769231	0.333333	0.5	0.5	0.4	0.25	0	0
1487	4	0	0	2	2				0	0	0.5	0.5			0.75	1	1	0.4	0.454545	0.625	0.111111	1	0.545455	0
1557	7	3	0	2	4				0.428571	0	0.285714	0.571429			0.0769231	0.5	0.875	0.25	0.0909091	0	0	0.8	0.2	0.5
1559	9	2	2	2	6				0.222222	0.222222	0.222222	0.666667			0	0.375	0.714286	0.5	0.333333	0.3		0.538462		0.352941
1560	9	5	0	3	3				0.555556	0	0.333333	0.333333			0.545455	1	0.9	0.375	0.333333	0.8		0.3
1561	11	5	0	2	6				0.454545	0	0.181818	0.545455			0	1	0.777778	0.714286	0.5	1		0.263158
1639	9	5	0	2	3				0.555556	0	0.222222	0.333333			0	0.5	0.8	0.333333	0.375	0.833333		0.428571
1641	14	6	0	3	8				0.428571	0	0.214286	0.571429			0.428571	0.6	0.923077	0.4	0.590909	0.75		0.142857
1781	4	1	0	3	1				0.25	0	0.75	0.25			0.222222	1	0.818182	0.25	0.611111	1		0.555556
1783	9	2	0	5	3				0.222222	0	0.555556	0.333333			0.555556	1	0.833333	0.333333	0	0.428571		0.769231
1785	7	3	0	3	3				0.428571	0	0.428571	0.428571			0.454545			1	0.8	0.375		0.833333
1786	7	2	0	2	3				0.285714	0	0.285714	0.428571			0.555556			0.6	0	0.8
sums (n injection sites)	161							average	0.302302	0.015873	0.315626	0.501099			0.428571				0.0769231	0.75
count (N embryos)	21							stdev	0.203518	0.0531213	0.231271	0.177507			0.25				0.375	0.375
								SEM	0.0444114	0.011592	0.0504674	0.0387352			0.222222				0.222222
															0.428571				0.571429
EGFP									percentage						0.285714				0.25
embryo n°	injection sites	Normal	Ipsi	FP	NT				Normal	Ipsi	FP	NT							0.888889
371	6	3	0	1	2				0.5	0	0.166667	0.333333							0.333333
374	3	3	0	0	0				1	0	0	0							0.714286
376	5	4	0	1	0				0.8	0	0.2	0							0.357143
400	4	4	0	0	0				1	0	0	0		average	0.302302	0.805357	0.852726	0.491295	0.385135	0.603241	0.246485	0.596311	0.349932	0.26252
402	6	6	0	0	0				1	0	0	0		stdev	0.203518	0.249649	0.0989839	0.216793	0.282738	0.28531	0.266854	0.264146	0.282952	0.183513
403	5	5	0	0	0				1	0	0	0		SEM	0.0444114	0.0667216	0.0264546	0.0541984	0.0565476	0.0672483	0.100861	0.0682021	0.106946	0.0648817
428	4	2	0	0	3				0.5	0	0	0.75
514	8	3	0	2	5				0.375	0	0.25	0.625
529	9	9	0	0	0				1	0	0	0
551	6	6	0	0	0				1	0	0	0
553	6	3	0	0	3				0.5	0	0	0.5
554	10	6	0	1	4				0.6	0	0.1	0.4
556	7	7	0	0	0				1	0	0	0
561	6	6	0	0	0				1	0	0	0
sums (n injection sites)	85							average	0.805357	0	0.0511905	0.18631
count (N embryos)	14							stdev	0.249649	0	0.0892668	0.27572
								SEM	0.0667216	0	0.0238576	0.0736892
untreated									percentage
embryo n°	injection sites	Normal	Ipsi	FP	NT				Normal	Ipsi	FP	NT
wt1	3	3	0	0	0				1	0	0	0
wt2	6	6	0	0	0				1	0	0	0
wt3	5	4	0	0	1				0.8	0	0	0.2
wt4	11	8	0	0	3				0.727273	0	0	0.272727
wt5	13	10	0	0	3				0.769231	0	0	0.230769
wt6	4	4	0	0	0				1	0	0	0
wt7	8	7	0	0	1				0.875	0	0	0.125
wt8	7	5	0	0	2				0.714286	0	0	0.285714
wt9	10	9	0	0	1				0.9	0	0	0.1
wt10	9	7	0	1	1				0.777778	0	0.111111	0.111111
wt11	5	4	0	0	1				0.8	0	0	0.2
wt12	13	12	0	0	1				0.923077	0	0	0.0769231
wt13	11	9	0	0	3				0.818182	0	0	0.272727
wt14	6	5	0	0	1				0.833333	0	0	0.166667
sums (n injection sites)	111							average	0.852726	0	0.00793651	0.145831
count (N embryos)	14							stdev	0.0989839	0	0.0296957	0.102873
								SEM	0.0264546	0	0.00793651	0.0274941
Endo OE									percentage
embryo n°	injection sites	Normal	Ipsi	FP	NT				Normal	Ipsi	FP	NT
747	14	5	0	3	6				0.357143	0	0.214286	0.428571
751	7	5	0	0	2				0.714286	0	0	0.285714
753	10	5	0	0	5				0.5	0	0	0.5
825	5	4	0	0	1				0.8	0	0	0.2
2962	3	1	0	1	1				0.333333	0	0.333333	0.333333
2964	5	2	0	2	1				0.4	0	0.4	0.2
2967	4	1	1	2	0				0.25	0.25	0.5	0
2970	4	2	0	1	1				0.5	0	0.25	0.25
2973	8	3	0	2	4				0.375	0	0.25	0.5
2975	7	5	0	1	1				0.714286	0	0.142857	0.142857
2982	3	1	0	0	2				0.333333	0	0	0.666667
2983	5	2	0	1	2				0.4	0	0.2	0.4
2991	4	1	0	1	2				0.25	0	0.25	0.5
2995	3	1	0	2	0				0.333333	0	0.666667	0
2997	4	4	0	0	0				1	0	0	0
3000	5	3	0	0	2				0.6	0	0	0.4
sums (n injection sites)	91							average	0.491295	0.015625	0.200446	0.300446
count (N embryos)	16							stdev	0.216793	0.0625	0.202735	0.201574
								SEM	0.0541984	0.015625	0.0506837	0.0503935
Hoxa1::Endo-L									percentage
embryo n°	injection sites	Normal	Ipsi	FP	NT				Normal	Ipsi	FP	NT
1671	4	0	0	0	4				0	0	0	1
1693	3	3	0	0	0				1	0	0	0
1689	6	0	0	3	3				0	0	0.5	0.5
1716	8	2		6	1				0.25	0	0.75	0.125
1728	8	4	0	3	2				0.5	0	0.375	0.25
1729	11	5	0	2	5				0.454545	0	0.181818	0.454545
1731	11	1	1	4	6				0.0909091	0.0909091	0.363636	0.545455
1735	12	4	0	1	5				0.333333	0	0.0833333	0.416667
1732	3	1	0	0	2				0.333333	0	0	0.666667
1740	12	6	0	3	4				0.5	0	0.25	0.333333
1742	8	3	0	2	3				0.375	0	0.25	0.375
1744	22	13	0	1	8				0.590909	0	0.0454545	0.363636
1754	18	11	0	3	7				0.611111	0	0.166667	0.388889
1757	5	0	0	1	4				0	0	0.2	0.8
1759	5	4	0	1	1				0.8	0	0.2	0.2
1845	6	0	0	1	6				0	0	0.166667	1
1846	13	1	0	10	5				0.0769231	0	0.769231	0.384615
1849	8	3	0	5	4				0.375	0	0.625	0.5
1850	9	2	0	4	6				0.222222	0	0.444444	0.666667
1851	14	8	0	1	5				0.571429	0	0.0714286	0.357143
1852	12	3	0	6	5				0.25	0	0.5	0.416667
1875	9	8	0	0	1				0.888889	0	0	0.111111
1876	6	2	0	0	4				0.333333	0	0	0.666667
1878	7	5	0	0	2				0.714286	0	0	0.285714
1879	14	5	0	1	8				0.357143	0	0.0714286	0.571429
sums (n injection sites)	234							average	0.385135	0.00363636	0.240564	0.455168
count (N embryos)	25							stdev	0.282738	0.0181818	0.239902	0.249546
								SEM	0.0565476	0.00363636	0.0479805	0.0499091
Hoxa1::Endo-M									percentage
embryo n°	injection sites	Normal	Ipsi	FP	NT				Normal	Ipsi	FP	NT
1491	5	5	0	0	0				1	0	0	0
1494	8	2	0	5	3				0.25	0	0.625	0.375
1548	6	3	0	0	3				0.5	0	0	0.5
1550	7	4	0	1	3				0.571429	0	0.142857	0.428571
1551	10	5	0	0	5				0.5	0	0	0.5
1552	8	5	0	0	3				0.625	0	0	0.375
1553	5	0	0	2	3				0	0	0.4	0.6
1568	20	6	2	6	12				0.3	0.1	0.3	0.6
1633	5	4	0	0	1				0.8	0	0	0.2
2695	6	6	0	0	0				1	0	0	0
2704	6	5	0	0	1				0.833333	0	0	0.166667
2705	12	9	0	1	2				0.75	0	0.0833333	0.166667
2707	6	6	0	0	0				1	0	0	0
2710	7	3	0	2	2				0.428571	0	0.285714	0.285714
2716	8	3	0	0	5				0.375	0	0	0.625
2719	5	4	0	0	1				0.8	0	0	0.2
2721	4	3	0	0	1				0.75	0	0	0.25
2727	8	3	0	1	4				0.375	0	0.125	0.5
sums (n injection sites)	136							average	0.603241	0.00555556	0.108995	0.320701
count (N embryos)	18							stdev	0.28531	0.0235702	0.180098	0.210595
								SEM	0.0672483	0.00555556	0.0424494	0.0496376
Hoxa1::Endo-H									percentage
embryo n°	injection sites	Normal	Ipsi	FP	NT				Normal	Ipsi	FP	NT
1498	12	0	0	8	7				0	0	0.666667	0.583333
1499	10	1	0	4	5				0.1	0	0.4	0.5
1543	5	2	0	1	2				0.4	0	0.2	0.4
1575	14	10	1	3	2				0.714286	0.0714286	0.214286	0.142857
1583	5	2	0	0	3				0.4	0	0	0.6
1584	18	2	5	8	11				0.111111	0.277778	0.444444	0.611111
1607	8	0	0	7	2				0	0	0.875	0.25
sums (n injection sites)	72							average	0.246485	0.0498866	0.400057	0.441043
count (N embryos)	7							stdev	0.266854	0.103957	0.298105	0.184847
								SEM	0.100861	0.0392919	0.112673	0.0698655
Math1::Endo-L									percentage
embryo n°	injection sites	Normal	Ipsi	FP	NT				Normal	Ipsi	FP	NT
1796	14	10	0	3	1				0.714286	0	0.214286	0.0714286
1798	7	5	0	1	1				0.714286	0	0.142857	0.142857
1800	7	6	0	0	1				0.857143	0	0	0.142857
1802	9	7	0	0	1				0.777778	0	0	0.111111
1804	8	2	0	2	5				0.25	0	0.25	0.625
1805	4	4	0	0	0				1	0	0	0
1825	10	8	0	0	2				0.8	0	0	0.2
1830	13	7	0	1	6				0.538462	0	0.0769231	0.461538
1854	10	3	0	3	5				0.3	0	0.3	0.5
1858	19	5	0	7	9				0.263158	0	0.368421	0.473684
1859	14	6	0	3	6				0.428571	0	0.214286	0.428571
1860	14	2	0	4	9				0.142857	0	0.285714	0.642857
1883	9	5	0	0	4				0.555556	0	0	0.444444
1885	13	10	0	0	3				0.769231	0	0	0.230769
1886	6	5	0	0	1				0.833333	0	0	0.166667
sums (n injection sites)	157							average	0.596311	0	0.123499	0.309452
count (N embryos)	15							stdev	0.264146	0	0.13608	0.209655
								SEM	0.0682021	0	0.0351357	0.0541327
Math1::Endo-M									percentage
embryo n°	injection sites	Normal	Ipsi	FP	NT				Normal	Ipsi	FP	NT
1507	10	6	0	1	3				0.6	0	0.1	0.3
1508	4	3	0	1	0				0.75	0	0.25	0
1509	11	1	0	6	6				0.0909091	0	0.545455	0.545455
1512	19	5	0	10	6				0.263158	0	0.526316	0.315789
1513	16	0	0	7	12				0	0	0.4375	0.75
1590	11	6	0	1	5				0.545455	0	0.0909091	0.454545
1597	15	3	0	4	9				0.2	0	0.266667	0.6
sums (n injection sites)	86							average	0.349932	0	0.316692	0.423684
count (N embryos)	7							stdev	0.282952	0	0.189628	0.24488
								SEM	0.106946	0	0.0716727	0.0925559
Math1::Endo-H									percentage
embryo n°	injection sites	Normal	Ipsi	FP	NT				Normal	Ipsi	FP	NT
1515	5	2	0	3	2				0.4	0	0.6	0.4
1516	9	2	0	5	5				0.222222	0	0.555556	0.555556
1517	8	3	2	3	2				0.375	0.25	0.375	0.25
1518	4	1	0	3	1				0.25	0	0.75	0.25
1520	11	0	3	8	7				0	0.272727	0.727273	0.636364
1522	14	0	1	6	8				0	0.0714286	0.428571	0.571429
1524	18	9	0	7	3				0.5	0	0.388889	0.166667
1529	17	6	0	4	7				0.352941	0	0.235294	0.411765
sums (n injection sites)	86							average	0.26252	0.0742695	0.507573	0.405222
count (N embryos)	8							stdev	0.183513	0.118234	0.181235	0.172717
								SEM	0.0648817	0.0418019	0.0640762	0.0610646

## Sheet: Figure 4B statistics
	Statistics (done with Graphpad Prism)
	Number of families	1
	Number of comparisons per family	45
	Alpha	0.05
	one-way ANOVA with Tukey's multiple comparisons test	Mean Diff.	95.00% CI of diff.	Significant?	Summary	Adjusted P Value
	dsEndo vs. EGFP	-50.29	-77.12 to -23.46	Yes	****	<0.0001
	dsEndo vs. untreated	-55	-81.83 to -28.17	Yes	****	<0.0001
	dsEndo vs. Endo OE	-18.78	-44.58 to 7.027	No	ns	0.37
	dsEndo vs. Hoxa1::Endo-L	-8.194	-31.21 to 14.82	No	ns	0.9789
	dsEndo vs. Hoxa1::Endo-M	-30.1	-55.08 to -5.126	Yes	**	0.0062
	dsEndo vs. Hoxa1::Endo-H	5.714	-28.22 to 39.65	No	ns	>0.9999
	dsEndo vs. Math1::Endo-L	-29.31	-55.60 to -3.026	Yes	*	0.0163
	dsEndo vs. Math1::Endo-M	-4.714	-38.65 to 29.22	No	ns	>0.9999
	dsEndo vs. Math1::Endo-H	4.036	-28.27 to 36.34	No	ns	>0.9999
	EGFP vs. untreated	-4.714	-34.10 to 24.68	No	ns	>0.9999
	EGFP vs. Endo OE	31.51	3.052 to 59.97	Yes	*	0.0177
	EGFP vs. Hoxa1::Endo-L	42.09	16.13 to 68.05	Yes	****	<0.0001
	EGFP vs. Hoxa1::Endo-M	20.18	-7.527 to 47.89	No	ns	0.3686
	EGFP vs. Hoxa1::Endo-H	56	20.00 to 92.00	Yes	****	<0.0001
	EGFP vs. Math1::Endo-L	20.97	-7.925 to 49.87	No	ns	0.3738
	EGFP vs. Math1::Endo-M	45.57	9.575 to 81.57	Yes	**	0.0031
	EGFP vs. Math1::Endo-H	54.32	19.86 to 88.79	Yes	****	<0.0001
	untreated vs. Endo OE	36.22	7.766 to 64.68	Yes	**	0.0028
	untreated vs. Hoxa1::Endo-L	46.81	20.85 to 72.76	Yes	****	<0.0001
	untreated vs. Hoxa1::Endo-M	24.9	-2.813 to 52.61	No	ns	0.1185
	untreated vs. Hoxa1::Endo-H	60.71	24.72 to 96.71	Yes	****	<0.0001
	untreated vs. Math1::Endo-L	25.69	-3.211 to 54.58	No	ns	0.1277
	untreated vs. Math1::Endo-M	50.29	14.29 to 86.28	Yes	***	0.0006
	untreated vs. Math1::Endo-H	59.04	24.57 to 93.50	Yes	****	<0.0001
	Endo OE vs. Hoxa1::Endo-L	10.58	-14.31 to 35.48	No	ns	0.9349
	Endo OE vs. Hoxa1::Endo-M	-11.33	-38.04 to 15.39	No	ns	0.9359
	Endo OE vs. Hoxa1::Endo-H	24.49	-10.75 to 59.73	No	ns	0.4377
	Endo OE vs. Math1::Endo-L	-10.54	-38.48 to 17.41	No	ns	0.9691
	Endo OE vs. Math1::Endo-M	14.06	-21.18 to 49.30	No	ns	0.9556
	Endo OE vs. Math1::Endo-H	22.81	-10.86 to 56.48	No	ns	0.4757
	Hoxa1::Endo-L vs. Hoxa1::Endo-M	-21.91	-45.95 to 2.128	No	ns	0.1069
	Hoxa1::Endo-L vs. Hoxa1::Endo-H	13.91	-19.34 to 47.16	No	ns	0.9409
	Hoxa1::Endo-L vs. Math1::Endo-L	-21.12	-46.52 to 4.276	No	ns	0.1944
	Hoxa1::Endo-L vs. Math1::Endo-M	3.48	-29.77 to 36.73	No	ns	>0.9999
	Hoxa1::Endo-L vs. Math1::Endo-H	12.23	-19.36 to 43.82	No	ns	0.9633
	Hoxa1::Endo-M vs. Hoxa1::Endo-H	35.82	1.180 to 70.45	Yes	*	0.0364
	Hoxa1::Endo-M vs. Math1::Endo-L	0.7889	-26.40 to 27.97	No	ns	>0.9999
	Hoxa1::Endo-M vs. Math1::Endo-M	25.39	-9.248 to 60.03	No	ns	0.3594
	Hoxa1::Endo-M vs. Math1::Endo-H	34.14	1.097 to 67.18	Yes	*	0.0367
	Hoxa1::Endo-H vs. Math1::Endo-L	-35.03	-70.62 to 0.5653	No	ns	0.0577
	Hoxa1::Endo-H vs. Math1::Endo-M	-10.43	-51.99 to 31.14	No	ns	0.9984
	Hoxa1::Endo-H vs. Math1::Endo-H	-1.679	-41.92 to 38.57	No	ns	>0.9999
	Math1::Endo-L vs. Math1::Endo-M	24.6	-10.99 to 60.19	No	ns	0.4461
	Math1::Endo-L vs. Math1::Endo-H	33.35	-0.6933 to 67.39	No	ns	0.06
	Math1::Endo-M vs. Math1::Endo-H	8.75	-31.49 to 48.99	No	ns	0.9995
	Test details	Mean 1	Mean 2	Mean Diff.	SE of diff.	n1	n2	q	DF
	dsEndo vs. EGFP	30.29	80.57	-50.29	8.339	21	14	8.528	135
	dsEndo vs. untreated	30.29	85.29	-55	8.339	21	14	9.327	135
	dsEndo vs. Endo OE	30.29	49.06	-18.78	8.02	21	16	3.311	135
	dsEndo vs. Hoxa1::Endo-L	30.29	38.48	-8.194	7.154	21	25	1.62	135
	dsEndo vs. Hoxa1::Endo-M	30.29	60.39	-30.1	7.763	21	18	5.484	135
	dsEndo vs. Hoxa1::Endo-H	30.29	24.57	5.714	10.55	21	7	0.7661	135
	dsEndo vs. Math1::Endo-L	30.29	59.6	-29.31	8.171	21	15	5.074	135
	dsEndo vs. Math1::Endo-M	30.29	35	-4.714	10.55	21	7	0.632	135
	dsEndo vs. Math1::Endo-H	30.29	26.25	4.036	10.04	21	8	0.5684	135
	EGFP vs. untreated	80.57	85.29	-4.714	9.135	14	14	0.7298	135
	EGFP vs. Endo OE	80.57	49.06	31.51	8.845	14	16	5.038	135
	EGFP vs. Hoxa1::Endo-L	80.57	38.48	42.09	8.068	14	25	7.378	135
	EGFP vs. Hoxa1::Endo-M	80.57	60.39	20.18	8.613	14	18	3.314	135
	EGFP vs. Hoxa1::Endo-H	80.57	24.57	56	11.19	14	7	7.079	135
	EGFP vs. Math1::Endo-L	80.57	59.6	20.97	8.982	14	15	3.302	135
	EGFP vs. Math1::Endo-M	80.57	35	45.57	11.19	14	7	5.76	135
	EGFP vs. Math1::Endo-H	80.57	26.25	54.32	10.71	14	8	7.172	135
	untreated vs. Endo OE	85.29	49.06	36.22	8.845	14	16	5.792	135
	untreated vs. Hoxa1::Endo-L	85.29	38.48	46.81	8.068	14	25	8.204	135
	untreated vs. Hoxa1::Endo-M	85.29	60.39	24.9	8.613	14	18	4.088	135
	untreated vs. Hoxa1::Endo-H	85.29	24.57	60.71	11.19	14	7	7.674	135
	untreated vs. Math1::Endo-L	85.29	59.6	25.69	8.982	14	15	4.044	135
	untreated vs. Math1::Endo-M	85.29	35	50.29	11.19	14	7	6.356	135
	untreated vs. Math1::Endo-H	85.29	26.25	59.04	10.71	14	8	7.794	135
	Endo OE vs. Hoxa1::Endo-L	49.06	38.48	10.58	7.738	16	25	1.934	135
	Endo OE vs. Hoxa1::Endo-M	49.06	60.39	-11.33	8.304	16	18	1.929	135
	Endo OE vs. Hoxa1::Endo-H	49.06	24.57	24.49	10.95	16	7	3.162	135
	Endo OE vs. Math1::Endo-L	49.06	59.6	-10.54	8.686	16	15	1.716	135
	Endo OE vs. Math1::Endo-M	49.06	35	14.06	10.95	16	7	1.816	135
	Endo OE vs. Math1::Endo-H	49.06	26.25	22.81	10.47	16	8	3.083	135
	Hoxa1::Endo-L vs. Hoxa1::Endo-M	38.48	60.39	-21.91	7.471	25	18	4.147	135
	Hoxa1::Endo-L vs. Hoxa1::Endo-H	38.48	24.57	13.91	10.34	25	7	1.903	135
	Hoxa1::Endo-L vs. Math1::Endo-L	38.48	59.6	-21.12	7.894	25	15	3.784	135
	Hoxa1::Endo-L vs. Math1::Endo-M	38.48	35	3.48	10.34	25	7	0.4762	135
	Hoxa1::Endo-L vs. Math1::Endo-H	38.48	26.25	12.23	9.818	25	8	1.762	135
	Hoxa1::Endo-M vs. Hoxa1::Endo-H	60.39	24.57	35.82	10.77	18	7	4.705	135
	Hoxa1::Endo-M vs. Math1::Endo-L	60.39	59.6	0.7889	8.45	18	15	0.132	135
	Hoxa1::Endo-M vs. Math1::Endo-M	60.39	35	25.39	10.77	18	7	3.335	135
	Hoxa1::Endo-M vs. Math1::Endo-H	60.39	26.25	34.14	10.27	18	8	4.701	135
	Hoxa1::Endo-H vs. Math1::Endo-L	24.57	59.6	-35.03	11.06	7	15	4.478	135
	Hoxa1::Endo-H vs. Math1::Endo-M	24.57	35	-10.43	12.92	7	7	1.142	135
	Hoxa1::Endo-H vs. Math1::Endo-H	24.57	26.25	-1.679	12.51	7	8	0.1898	135
	Math1::Endo-L vs. Math1::Endo-M	59.6	35	24.6	11.06	15	7	3.145	135
	Math1::Endo-L vs. Math1::Endo-H	59.6	26.25	33.35	10.58	15	8	4.457	135
	Math1::Endo-M vs. Math1::Endo-H	35	26.25	8.75	12.51	7	8	0.9893	135
