# Supplementary material for: Endoglycan plays a role in axon guidance by modulating cell adhesion
Source: eLife. 2021 Mar 2;10:e64767. doi: 10.7554/eLife.64767 (PMC7946425; doi:10.7554/eLife.64767)
Supplement: Figure 5—figure supplement 1—source data 1. [file elife-64767-fig5-figsupp1-data1.xlsx]

## Sheet: Figure  5–figure supplement 1E
			Control HEK		Endo HEK					Statistics (done with Graphpad Prism)
			well	# of MN	well	# of MN
			1a	58	1a	23				Column B	Endo HEK
			1b	60	1b	15				vs.	vs.
			1c	66	1c	12				Column A	Control HEK
			1d	62	1d	26
			2a	59	2a	15				Unpaired t test
			2b	42	2b	9				P value	<0.0001
			2c	69	2c	18				P value summary	****
			2d	57	2d	22				Significantly different (P < 0.05)?	Yes
			3a	45	3a	15				One- or two-tailed P value?	Two-tailed
			3b	45	3b	18				t, df	t=12.60, df=30
			3c	40	3c	23
			3d	45	3d	22				How big is the difference?
			4a	43	4a	27				Mean of column A	52.75
			4b	59	4b	22				Mean of column B	18.25
			4c	44	4c	15				Difference between means (B - A) ± SEM	-34.50 ± 2.737
			4d	50	4d	10				95% confidence interval	-40.09 to -28.91
			average	52.75		18.25				R squared (eta squared)	0.8412
			stdev	9.4481		5.53173
			SEM	2.36203		1.38293				F test to compare variances
			unpaired t.test p-value	1.61786e-13						F, DFn, Dfd	2.917, 15, 15
										P value	0.0461
										P value summary	*
										Significantly different (P < 0.05)?	Yes
										Data analyzed
										Sample size, column A	16
										Sample size, column B	16
