# Supplementary material for: Endoglycan plays a role in axon guidance by modulating cell adhesion
Source: eLife. 2021 Mar 2;10:e64767. doi: 10.7554/eLife.64767 (PMC7946425; doi:10.7554/eLife.64767)
Supplement: Figure 5—figure supplement 2—source data 1. [file elife-64767-fig5-figsupp2-data1.xlsx]

## Sheet: Figure 5-figure supplement 2I
		wt HEK	wtHEK+N	wtHEK+O	Endo	Endo+N	Endo+O			Statistics (done with Graphpad Prism)
		37	31	41	17	55	45
		37	37	46	21	56	43			Number of families	1
		32	30	42	21	48	51			Number of comparisons per family	15
		47	35	40	9	47	56			Alpha	0.05
		34	39	36	25	11	35
		50	42	31	12	12	29			One-way ANOVA with Tukey's multiple comparisons test	Mean Diff.	95.00% CI of diff.	Significant?	Summary	Adjusted P Value
		60	34	37	23	24	36			wt HEK vs. wtHEK+N	7.75	-6.010 to 21.51	No	ns	0.5615
		29	40	46	29	46	34			wt HEK vs. wtHEK+O	3.875	-9.885 to 17.63	No	ns	0.9603
		40			45					wt HEK vs. Endo	20.98	9.115 to 32.85	Yes	****	<0.0001
		53			29					wt HEK vs. Endo+N	6.375	-7.385 to 20.13	No	ns	0.7456
		45			25					wt HEK vs. Endo+O	2.625	-11.13 to 16.38	No	ns	0.993
		70			13					wtHEK+N vs. wtHEK+O	-3.875	-19.76 to 12.01	No	ns	0.9787
		40			27					wtHEK+N vs. Endo	13.23	-1.049 to 27.51	No	ns	0.0843
		36								wtHEK+N vs. Endo+N	-1.375	-17.26 to 14.51	No	ns	0.9998
		34								wtHEK+N vs. Endo+O	-5.125	-21.01 to 10.76	No	ns	0.9307
		56								wtHEK+O vs. Endo	17.11	2.826 to 31.39	Yes	*	0.0102
	average	43.75	36	39.875	22.7692	37.375	41.125			wtHEK+O vs. Endo+N	2.5	-13.39 to 18.39	No	ns	0.9972
	stdev	11.4455	4.27618	5.11126	9.31087	18.7307	9.24952			wtHEK+O vs. Endo+O	-1.25	-17.14 to 14.64	No	ns	>0.9999
	SEM	2.86138	1.51186	1.8071	2.58237	6.6223	3.2702			Endo vs. Endo+N	-14.61	-28.89 to -0.3264	Yes	*	0.0422
										Endo vs. Endo+O	-18.36	-32.64 to -4.076	Yes	**	0.0047
										Endo+N vs. Endo+O	-3.75	-19.64 to 12.14	No	ns	0.9815
										Test details	Mean 1	Mean 2	Mean Diff.	SE of diff.	n1	n2	q	DF
										wt HEK vs. wtHEK+N	43.75	36	7.75	4.66	16	8	2.352	55
										wt HEK vs. wtHEK+O	43.75	39.88	3.875	4.66	16	8	1.176	55
										wt HEK vs. Endo	43.75	22.77	20.98	4.019	16	13	7.383	55
										wt HEK vs. Endo+N	43.75	37.38	6.375	4.66	16	8	1.935	55
										wt HEK vs. Endo+O	43.75	41.13	2.625	4.66	16	8	0.7966	55
										wtHEK+N vs. wtHEK+O	36	39.88	-3.875	5.381	8	8	1.018	55
										wtHEK+N vs. Endo	36	22.77	13.23	4.836	8	13	3.869	55
										wtHEK+N vs. Endo+N	36	37.38	-1.375	5.381	8	8	0.3613	55
										wtHEK+N vs. Endo+O	36	41.13	-5.125	5.381	8	8	1.347	55
										wtHEK+O vs. Endo	39.88	22.77	17.11	4.836	8	13	5.002	55
										wtHEK+O vs. Endo+N	39.88	37.38	2.5	5.381	8	8	0.657	55
										wtHEK+O vs. Endo+O	39.88	41.13	-1.25	5.381	8	8	0.3285	55
										Endo vs. Endo+N	22.77	37.38	-14.61	4.836	13	8	4.271	55
										Endo vs. Endo+O	22.77	41.13	-18.36	4.836	13	8	5.368	55
										Endo+N vs. Endo+O	37.38	41.13	-3.75	5.381	8	8	0.9855	55
