# Supplementary material for: Endoglycan plays a role in axon guidance by modulating cell adhesion
Source: eLife. 2021 Mar 2;10:e64767. doi: 10.7554/eLife.64767 (PMC7946425; doi:10.7554/eLife.64767)
Supplement: Figure 5—source data 1. [file elife-64767-fig5-data1.xlsx]

## Sheet: Figure 5D
	raw data Figure 5D	Vehicle		Neuraminidase		O-Glycosidase		→Normalized to vehicle HEK-ctrl for each replicate:	Vehicle		Neuraminidase		O-Glycosidase
	carpet:	HEK-ctrl	HEK-Endo-myc	HEK-ctrl	HEK-Endo-myc	HEK-ctrl	HEK-Endo-myc		HEK-ctrl	HEK-Endo-myc	HEK-ctrl	HEK-Endo-myc	HEK-ctrl	HEK-Endo-myc
	replicate 1	7	1	5	12	16	11		1.23529	0.176471	0.882353	2.11765	2.82353	1.94118
		3	1	5	8	16	9		0.529412	0.176471	0.882353	1.41176	2.82353	1.58824
		6	1	7	6	7	13		1.05882	0.176471	1.23529	1.05882	1.23529	2.29412
		5	2	7	7	11	9		0.882353	0.352941	1.23529	1.23529	1.94118	1.58824
		6	5	9	6	9	5		1.05882	0.882353	1.58824	1.05882	1.58824	0.882353
		3	4	10	8	13	8		0.529412	0.705882	1.76471	1.41176	2.29412	1.41176
		6	4	8	15	13	6		1.05882	0.705882	1.41176	2.64706	2.29412	1.05882
		8	3			10	11		1.41176	0.529412			1.76471	1.94118
		7	3						1.23529	0.529412
	replicate 2	22	2	11	6	11	15		1.45588	0.132353	0.727941	0.397059	0.727941	0.992647
		8	3	11	9	6	11		0.529412	0.198529	0.727941	0.595588	0.397059	0.727941
		13	1	11	12	9	8		0.860294	0.0661765	0.727941	0.794118	0.595588	0.529412
		11	3	6	18	16	15		0.727941	0.198529	0.397059	1.19118	1.05882	0.992647
		16	3	10	13	12	13		1.05882	0.198529	0.661765	0.860294	0.794118	0.860294
		19	1	7	9	11	8		1.25735	0.0661765	0.463235	0.595588	0.727941	0.529412
		17	0	7	15	7	6		1.125	0	0.463235	0.992647	0.463235	0.397059
		12	2						0.794118	0.132353
		18	3						1.19118	0.198529
	replicate 3	10	5	12	12	16	11		0.841121	0.420561	1.00935	1.00935	1.34579	0.925234
		6	9	11	5	8	15		0.504673	0.757009	0.925234	0.420561	0.672897	1.26168
		12	4	7	12	14	8		1.00935	0.336449	0.588785	1.00935	1.17757	0.672897
		9	8	11	13	14	8		0.757009	0.672897	0.925234	1.09346	1.17757	0.672897
		10	9	11	13	11	6		0.841121	0.757009	0.925234	1.09346	0.925234	0.504673
		13	4	10	10	14	13		1.09346	0.336449	0.841121	0.841121	1.17757	1.09346
		16	7	6	10	15	11		1.34579	0.588785	0.504673	0.841121	1.26168	0.925234
		14	3						1.17757	0.252336
		17	2						1.42991	0.168224
	replicate 4	4	5	5	7	9	14		0.482759	0.603448	0.603448	0.844828	1.08621	1.68966
		6	10	10	3	12	16		0.724138	1.2069	1.2069	0.362069	1.44828	1.93103
		8	5	3	12	7	14		0.965517	0.603448	0.362069	1.44828	0.844828	1.68966
		7	8	6	10	6	9		0.844828	0.965517	0.724138	1.2069	0.724138	1.08621
		4	4	11	6	2	8		0.482759	0.482759	1.32759	0.724138	0.241379	0.965517
		17	11	6	9	4	13		2.05172	1.32759	0.724138	1.08621	0.482759	1.56897
		12	8	6	5	4	9		1.44828	0.965517	0.724138	0.603448	0.482759	1.08621
	Average	10.3529	4.23529	8.17857	9.67857	10.4483	10.4483		1	0.466805	0.877184	1.034	1.19235	1.16581
	stdev	5.12204	2.90307	2.52475	3.60096	3.97839	3.1576		0.351517	0.340764	0.359619	0.488367	0.697508	0.504749
	count	34	34	28	28	29	29		34	34	28	28	29	29
	Statistics (done with Graphpad Prism)
	Number of families	1
	Number of comparisons per family	15
	Alpha	0.05
	one-way ANOVA with Tukey's multiple comparisons test	Mean Diff.	95.00% CI of diff.	Significant?	Summary	Adjusted P Value
	HEKCtrl vehic. vs. HEKEndo-myc vehic.	0.519	0.1893 to 0.8488	Yes	***	0.0002
	HEKCtrl vehic. vs. HEKCtrl +N	0.1228	-0.2215 to 0.4672	No	ns	0.9081
	HEKCtrl vehic. vs. HEKEndo-myc +N	-0.034	-0.3783 to 0.3103	No	ns	0.9997
	HEKCtrl vehic. vs. HEKCtrl +O	-0.1923	-0.5334 to 0.1487	No	ns	0.5831
	HEKCtrl vehic. vs. HEKEndo-myc +O	-0.1658	-0.5069 to 0.1753	No	ns	0.7265
	HEKEndo-myc vehic. vs. HEKCtrl +N	-0.3962	-0.7429 to -0.04954	Yes	*	0.015
	HEKEndo-myc vehic. vs. HEKEndo-myc +N	-0.553	-0.8997 to -0.2064	Yes	***	0.0001
	HEKEndo-myc vehic. vs. HEKCtrl +O	-0.7114	-1.055 to -0.3680	Yes	****	<0.0001
	HEKEndo-myc vehic. vs. HEKEndo-myc +O	-0.6849	-1.028 to -0.3414	Yes	****	<0.0001
	HEKCtrl +N vs. HEKEndo-myc +N	-0.1568	-0.5174 to 0.2038	No	ns	0.8098
	HEKCtrl +N vs. HEKCtrl +O	-0.3152	-0.6727 to 0.04234	No	ns	0.1182
	HEKCtrl +N vs. HEKEndo-myc +O	-0.2886	-0.6461 to 0.06887	No	ns	0.1891
	HEKEndo-myc +N vs. HEKCtrl +O	-0.1584	-0.5159 to 0.1992	No	ns	0.7976
	HEKEndo-myc +N vs. HEKEndo-myc +O	-0.1318	-0.4893 to 0.2257	No	ns	0.8955
	HEKCtrl +O vs. HEKEndo-myc +O	0.02653	-0.3278 to 0.3809	No	ns	>0.9999
