# Supplementary material for: Endoglycan plays a role in axon guidance by modulating cell adhesion
Source: eLife. 2021 Mar 2;10:e64767. doi: 10.7554/eLife.64767 (PMC7946425; doi:10.7554/eLife.64767)
Supplement: Figure 6—source data 1. [file elife-64767-fig6-data1.xlsx]

## Sheet: Figure 6B
					normalized time of blasting
					HEK-ctrl	HEK-Endo-myc
				replicate 1	0.761246	1.03806
					1.14187	0.83045					Statistics (done with Graphpad Prism)
					1.10727	0.622837
					0.934256	0.588235					two tailed Mann Whitney test
					0.657439	0.795848					P value	<0.0001
					1.10727	0.899654					Exact or approximate P value?	Exact
					0.588235	0.83045					P value summary	****
					2.35294						Significantly different (P < 0.05)?	Yes
					0.83045						One- or two-tailed P value?	Two-tailed
					0.519031						Sum of ranks in column A,B	2417 , 1679
				replicate 2	0.912281	0.736842					Mann-Whitney U	403.5
					0.947368	0.842105
					0.807018	0.736842					Difference between medians
					1.12281	0.631579					Median of column A	0.9100, n=40
					0.701754	0.631579					Median of column B	0.5878, n=50
					1.61404	0.631579					Difference: Actual	-0.3222
					0.561404	0.701754					Difference: Hodges-Lehmann	-0.3027
					0.842105	0.45614
					0.947368
					1.89474
					1.01754
					0.631579
				replicate 3	1.99223	0.559223
					1.46796	0.908738
					0.664078	0.733981
					1.43301	1.1534
					3.42524	0.629126
					0.908738	0.803883
					0.908738	0.838835
					0.594175	0.908738
					0.454369	0.384466
					0.629126	0.908738
					0.384466	0.768932
					0.24466	0.803883
					1.1534	0.559223
					0.664078	0.24466
					0.454369	0.419417
					0.454369	0.279612
					0.559223	0.908738
					1.60777	0.349515
						0.594175
						0.24466
						0.24466
						0.24466
						0.733981
						0.559223
						0.419417
						0.209709
						0.559223
						0.314563
						0.24466
						0.349515
						0.349515
						0.174757
						0.279612
						0.384466
						0.209709
				average	1	0.585071
				stdev	0.607949	0.255371
				SEM	0.0961252	0.036115
				count (n growth cones)	40	50
				N (replicates) = 3

## Sheet: Figure 6C
						normalized time of blasting
						CN-ctrl	CN-Endo-myc
					replicate 1	1.64427	1.28458					Statistics (done with Graphpad Prism)
						1.95257	0.667984
						0.667984	0.770751					two tailed Mann Whitney test
						1.49012	0.513834					P value	0.0251
						0.822134	0.976285					Exact or approximate P value?	Exact
						0.667984	1.64427					P value summary	*
						0.822134	1.38735					Significantly different (P < 0.05)?	Yes
						0.667984						One- or two-tailed P value?	Two-tailed
					replicate 2	0.822134	0.976285					Sum of ranks in column A,B	3043 , 2314
						1.5415	1.8498					Mann-Whitney U	987.5
						1.07905	0.822134
						1.07905	0.770751					Difference between medians
						0.924901	0.719368					Median of column A	0.8729, n=52
						1.38735	0.924901					Median of column B	0.7708, n=51
					replicate 3	0.822134	0.411067					Difference: Actual	-0.1022
						0.667984	0.770751					Difference: Hodges-Lehmann	-0.153
						0.822134	0.822134
						0.976285	0.513834
						1.38735	0.667984
						0.924901	0.822134
						1.2332	0.256917
						0.770751	0.822134
						0.411067	0.719368
						0.822134	0.667984
						0.667984	0.822134
						0.924901	0.873518
							0.667984
					replicate 4	0.733542	0.950888
						0.760711	1.16823
						1.54859	0.434692
						2.58098	0.787879
						0.706374	0.624869
						0.516196	0.489028
						0.597701	0.489028
						0.570533
					replicate 5	1.03239	0.733542
						0.652038	0.92372
						0.652038	1.49425
						0.92372	1.00522
						0.760711	1.00522
						1.1954	0.516196
					replicate 6	0.733542	0.733542
						1.03239	0.815047
						0.652038	0.353187
						0.815047	0.434692
						1.22257	0.489028
						1.00522	0.489028
						1.57576	1.65726
						1.52142	0.92372
						1.54859	0.380355
						0.733542	1.30408
						0.978056	1.49425
						0.950888	0.624869
					average	1	0.832708
					stdev	0.41006	0.361323
					SEM	0.0568651	0.0505954
					count (n growth cones)	52	51
					N(replicates) = 6
