# Supplementary material for: Endoglycan plays a role in axon guidance by modulating cell adhesion
Source: eLife. 2021 Mar 2;10:e64767. doi: 10.7554/eLife.64767 (PMC7946425; doi:10.7554/eLife.64767)
Supplement: Figure 7—source data 1. [file elife-64767-fig7-data1.xlsx]

## Sheet: Figure 7E
		normalized growth cone area					Statistics (done with Graphpad Prism)
		HEK Ctrl	HEK-Endo-myc
		1.64773	1.59091				Unpaired t test
		2.30114	0.909091				P value	0.9694
		0.340909	0.170455				P value summary	ns
		0.113636	0.994318				Significantly different (P < 0.05)?	No
		0.596591	0.397727				One- or two-tailed P value?	Two-tailed
		0.239678	0.454545				t, df	t=0.03858, df=50
		1.34051	1.39205
		0.31492	0.511364				How big is the difference?
		1.03673	0.284091				Mean of column A	1
		0.794276	1.47727				Mean of column B	0.993
		0.61312	0.833287				Difference between means (B - A) ± SEM	-0.006985 ± 0.1810
		0.61591	1.68052				95% confidence interval	-0.3706 to 0.3566
		0.462625	0.418044				R squared (eta squared)	2.977e-05
		0.273119	0.855589
		0.827717	0.755255				F test to compare variances
		0.967062	1.10363				F, DFn, Dfd	1.260, 26, 24
		0.498856	1.95086				P value	0.5721
		0.833287	1.97594				P value summary	ns
		1.32936	2.06512				Significantly different (P < 0.05)?	No
		0.60198	1.93412
		2.31873	0.961492				Data analyzed
		0.92247	1.10641				Sample size, column A	27
		1.64428	0.345582				Sample size, column B	25
		0.680013	0.451485
		2.02889	0.206237
		1.05625
		2.60021
	average	1	0.993015
	stdev	0.687197	0.612173
	count (n growth cones)	27	25
	N(replicates) = 3

## Sheet: Figure 7F
		normalized growth cone area					Statistics (done with Graphpad Prism)
		CN-Ctrl	CN-Endo-myc
		0.54115	0.811725				Mann Whitney test
		0.43292	1.29876				P value	0.3261
		0.97407	2.11048				Exact or approximate P value?	Exact
		0.297632	0.32469				P value summary	ns
		0.838782	0.378805				Significantly different (P < 0.05)?	No
		1.05524	1.70462				One- or two-tailed P value?	Two-tailed
		0.405862	0.43292				Sum of ranks in column A,B	2641 , 2309
		1.56933	0.43292				Mann-Whitney U	1084
		0.784667	0.487035
		2.19166	0.459977				Difference between medians
		0.595265	1.35287				Median of column A	0.8356, n=50
		0.676437	0.947012				Median of column B	0.7898, n=49
		0.676437	0.595265				Difference: Actual	-0.04583
		2.00225	2.81398				Difference: Hodges-Lehmann	-0.1082
		1.75874	1.65051
		1.13641	1.43405
		2.08343	1.43405
		0.784667	1.05524
		0.270575	0.75761
		1.4611	1.32582
		1.62345	0.892897
		0.919955	0.54115
		0.568207	1.13641
		0.351747	1.4611
		1.1954	0.448276
		0.832512	0.36289
		0.426929	0.448276
		0.576355	0.619048
		0.555008	0.384236
		0.768473	0.298851
		0.469622	1.21675
		0.981938	1.34483
		1.7931	1.17406
		0.576355	1.08867
		0.789819	0.170772
		0.960591	2.79639
		0.448276	0.789819
		0.917898	0.448276
		0.597701	0.939245
		1.06732	1.8358
		2.17734	0.619048
		1.25944	0.192118
		0.789819	1.06732
		0.960591	0.789819
		1.57964	0.320197
		1.94253	1.40887
		0.597701	0.341544
		1.92118	0.512315
		1.00328	0.320197
		0.811166
	average	1	0.934235
	stdev	0.541088	0.620728
	count (n growth cones)	50	49
	N (replicates) = 6
