# Supplementary material for: Endoglycan plays a role in axon guidance by modulating cell adhesion
Source: eLife. 2021 Mar 2;10:e64767. doi: 10.7554/eLife.64767 (PMC7946425; doi:10.7554/eLife.64767)
Supplement: Figure 8—source data 1. [file elife-64767-fig8-data1.xlsx]

## Sheet: Figure 8G
	dsNrCAM							Statistics (done with Graphpad Prism):
		Embryo number	injection sites	% of DiI sites with ipsi. turns					dsNrCAM	dsNrCAM + dsPodxl	dsNrCAM + dsCD34	dsNrCAM + dsEndo	dsPodxl	dsCD34
	1	3475	10	60				Number of values (N(embryos))	7	8	10	10	9	8
	2	3472	15	67
	3	3474	10	30				Minimum	30	17	11	0	0	0
	4	3468	16	75				Maximum	100	92	86	58	40	33
	5	3467	10	40				Range	70	75	75	58	40	33
	6	3470	11	73
	7	3456	18	100				Mean	63.57	56.63	49.6	7.3	12.33	7.25
								Std. Deviation	23.29	25.93	25.62	18.5	15.7	12.08
	dsNrCAM + dsPodxl							Std. Error of Mean	8.802	9.169	8.102	5.8	5.233	4.271
		Embryo number	injection sites	% of DiI sites with ipsi. turns
	1	3580	13	54
	2	3587	6	17				One-way ANOVA with Tukey's multiple comparisons test	Mean Diff.	95.00% CI of diff.	Significant?	Summary	Adjusted P Value
	3	3585	12	67				dsNrCAM vs. dsNrCAM + dsPodxl	6.94	-25.06 to 38.94	No	ns	0.9868	A-B
	4	3586	10	30				dsNrCAM vs. dsNrCAM + dsCD34	13.97	-16.50 to 44.44	No	ns	0.7482	A-C
	5	3698	12	92				dsNrCAM vs. dsNrCAM + dsEndo	56.27	25.80 to 86.74	Yes	****	<0.0001	A-D
	6	3696	8	63				dsNrCAM vs. dsPodxl	51.24	20.08 to 82.40	Yes	***	0.0002	A-E
	7	3694	9	44				dsNrCAM vs. dsCD34	56.32	24.32 to 88.32	Yes	****	<0.0001	A-F
	8	3693	7	86				dsNrCAM + dsPodxl vs. dsNrCAM + dsCD34	7.03	-22.30 to 36.36	No	ns	0.9794	B-C
								dsNrCAM + dsPodxl vs. dsNrCAM + dsEndo	49.33	20.00 to 78.66	Yes	***	0.0001	B-D
	dsNrCAM + dsCD34							dsNrCAM + dsPodxl vs. dsPodxl	44.3	14.26 to 74.34	Yes	***	0.0009	B-E
								dsNrCAM + dsPodxl vs. dsCD34	49.38	18.47 to 80.29	Yes	***	0.0003	B-F
		Embryo number	injection sites	% of DiI sites with ipsi. turns				dsNrCAM + dsCD34 vs. dsNrCAM + dsEndo	42.3	14.65 to 69.95	Yes	***	0.0005	C-D
	1	3565	13	38				dsNrCAM + dsCD34 vs. dsPodxl	37.27	8.863 to 65.68	Yes	**	0.004	C-E
	2	3569	11	55				dsNrCAM + dsCD34 vs. dsCD34	42.35	13.02 to 71.68	Yes	**	0.0012	C-F
	3	3568	15	73				dsNrCAM + dsEndo vs. dsPodxl	-5.03	-33.44 to 23.38	No	ns	0.9948	D-E
	4	3561	9	67				dsNrCAM + dsEndo vs. dsCD34	0.05	-29.28 to 29.38	No	ns	>0.9999	D-F
	5	3566	11	64				dsPodxl vs. dsCD34	5.08	-24.96 to 35.12	No	ns	0.9958	E-F
	6	3562	9	11
	7	3691	7	86
	8	3692	10	60
	9	3687	8	13
	10	3688	7	29
	dsNrCAM + dsEndo
		Embryo number	injection sites	% of DiI sites with ipsi. turns
	1	T4572	9	0
	2	T4574	7	14.2857
	3	T4577	7	0
	4	T4578	10	0
	5	T4584	9	0
	6	T4629	9	0
	7	T4631	4	0
	8	T4633	12	58.3333
	9	T4634	6	0
	10	T4636	5	0
	dsPodxl
		Embryo number	injection sites	% of DiI sites with ipsi. turns
	1	3304	10	20
	2	3244	12	0
	3	3247	17	0
	4	3302	10	0
	5	3388	9	0
	6	3452	14	21
	7	3451	11	0
	8	3453	10	40
	9	3450	10	30
	dsCD34
		NR	DiI Sites	% of DiI sites with ipsi. turns
	1	3288	12	17
	2	3289	10	0
	3	3290	10	0
	4	3235	16	0
	5	3239	15	0
	6	3242	15	33
	7	3243	13	8
	8	3297	10	0
