# Supplementary material for: Endoglycan plays a role in axon guidance by modulating cell adhesion
Source: eLife. 2021 Mar 2;10:e64767. doi: 10.7554/eLife.64767 (PMC7946425; doi:10.7554/eLife.64767)
Supplement: Figure 11—source data 1. [file elife-64767-fig11-data1.xlsx]

## Sheet: Figure 11A-C
	Control						dsEndo						Endo overexpression (OE)
			GC area [um^2]						GC area [um^2]						GC area [um^2]
	experiment	GC ID	1st half	2nd half	exit site	time point of start in TL	experiment	GC ID	1st half	2nd half	exit site	time point of start in TL	experiment	GC ID	1st half	2nd half	exit site	time point of start in TL
	Embryo 1	1	50.3442	63.934	171.417	46	Embryo 1	1	42.0047	56.2122	128.794	3	Embryo 1	1	27.7972	16.6783	62.0808	5
	Embryo 1	2	87.4072	79.6854	136.824	59	Embryo 1	3	39.5338	42.9316	56.5214	11	Embryo 1	3	40.4608	50.6527	74.1259	22
	Embryo 1	3	43.5494	35.2098	85.8625	43	Embryo 1	4	45.711	29.9596	80.6123	45	Embryo 1	7	36.7545	47.5641	90.1866	2
	Embryo 1	4	50.035	73.8174	97.2907	66	Embryo 1	5	56.8299	46.6379	74.4352	30	Embryo 1	8	49.7265	47.5641	89.8781	4
	Embryo 1	5	57.4476	71.0374	167.401	56	Embryo 1	6	29.9596	32.1212	27.1795	55	Embryo 1	9	57.1391	61.4631	88.3334	8
	Embryo 1	6	48.4911	56.8299	94.5106	30	Embryo 1	8	51.5797	28.4149	100.379	16	Embryo 1	12	57.4476	55.9037	93.5844	74
	Embryo 1	7	36.7545	44.4756	100.997	25	Embryo 1	9	48.7996	55.9037	111.189	30	Embryo 1	14	61.7716	64.8602	163.695	64
	Embryo 1	8	49.4173	36.7545	99.7615	5	Embryo 1	13	32.739	42.0047	131.574	10	Embryo 1	15	56.8299	45.711	83.7009	53
	Embryo 1	9	49.4173	59.61	170.799	41	Embryo 1	15	34.9013	20.3846	54.359	2	Embryo 1	16	55.5945	61.1539	48.1819	32
	Embryo 1	10	37.063	42.3139	93.2751	59	Embryo 1	16	44.1671	31.8127	118.911	5	Embryo 1	22	51.8882	46.3287	83.7009	16
	Embryo 1	11	41.6962	58.3745	176.667	69	Embryo 1	17	38.9161	33.3567	108.718	11	Embryo 1	23	53.1236	49.1088	60.5362	7
	Embryo 1	12	42.9316	38.2984	97.2907	63	Embryo 1	19	38.2984	27.7972	71.0374	43	Embryo 1	26	57.7568	25.6356	75.6706	64
	Embryo 1	13	42.0047	54.359	130.338	33	Embryo 1	20	45.0933	33.9744	93.2751	51	Embryo 1	27	46.6379	51.5797	104.394	12
	Embryo 1	14	35.519	39.5338	144.237	52	Embryo 1	30	43.5494	46.3287	98.5261	6	Embryo 1	28	44.1671	44.4756	62.6986	8
	Embryo 1	19	33.3567	49.7265	117.984	73	Embryo 1	31	60.2277	21.9293	100.688	2	Embryo 1	29	46.6379	34.5921	118.601	38
	Embryo 1	20	43.8578	65.4779	140.531	6	Embryo 1	33	48.4911	38.2984	94.2021	1	Embryo 1	30	55.5945	37.9899	77.5237	5
	Embryo 2	1	40.4608	65.4779	108.081	11	Embryo 1	34	29.3419	29.6504	106.247	6	Embryo 1	36	51.2704	26.2533	67.3311	11
	Embryo 2	2	48.4911	60.2277	75.3614	1	Embryo 1	38	48.7996	32.739	98.5261	31	Embryo 1	37	25.3264	38.6076	63.3163	13
	Embryo 2	3	77.2145	40.7693	101.305	4	Embryo 1	39	38.2984	34.5921	70.4196	20	Embryo 1	38	58.9923	33.6659	114.277	8
	Embryo 2	4	50.3442	26.2533	116.44	7	Embryo 1	40	61.4631	31.195	110.571	55	Embryo 1	40	40.7693	47.8734	148.561	69
	Embryo 2	5	38.9161	44.4756	99.1438	13	Embryo 1	41	70.1111	46.3287	155.047	5	Embryo 1	43	68.5665	41.0785	79.3769	10
	Embryo 2	8	62.6986	38.9161	73.1997	44	Embryo 1	42	66.0956	40.7693	99.4523	2	Embryo 1	44	40.1515	42.9316	89.8781	21
	Embryo 2	9	81.23	68.5665	72.2728	56	Embryo 1	44	47.8734	34.9013	85.554	5	Embryo 1	45	48.4911	40.7693	73.8174	6
	Embryo 2	10	37.3722	37.9899	94.8198	53	Embryo 1	49	46.9464	50.3442	95.4375	2	Embryo 1	46	31.8127	52.8151	108.41	7
	Embryo 2	11	46.0202	45.711	84.6271	29	Embryo 1	55	56.2122	35.8275	136.207	10	Embryo 1	51	47.2556	48.4911	88.9511	3
	Embryo 2	12	53.7413	37.3722	75.3614	38	Embryo 1	56	30.5773	35.2098	100.997	4	Embryo 1	53	34.9013	29.9596	65.7871	20
	Embryo 2	13	44.1671	56.5214	84.9363	42	Embryo 1	57	53.4328	33.6659	75.6706	7	Embryo 1	56	38.9161	47.2556	59.61	6
	Embryo 2	14	58.683	61.4631	113.969	72	Embryo 1	58	41.6962	34.2836	115.513	3	Embryo 2	1	38.2984	37.063	145.473	1
	Embryo 2	16	69.4934	59.3007	74.7437	78	Embryo 1	59	44.4756	35.2098	88.3334	4	Embryo 2	2	42.0047	33.3567	89.5688	17
	Embryo 2	17	58.9923	52.8151	124.161	32	Embryo 1	60	30.8858	40.1515	74.7437	4	Embryo 2	3	46.6379	42.6224	143.31	8
	Embryo 2	18	46.0202	53.1236	132.809	13	Embryo 1	61	37.063	35.2098	108.718	17	Embryo 2	4	41.6962	32.4305	129.412	5
	Embryo 2	19	48.4911	37.3722	72.8905	32	Embryo 1	63	66.7133	27.4887	84.0094	46	Embryo 2	5	44.7848	42.6224	105.939	1
	Embryo 2	20	38.2984	43.2401	187.477	20	Embryo 1	68	49.1088	33.6659	60.2277	58	Embryo 2	6	26.2533	32.4305	103.468	3
	Embryo 2	21	50.035	51.8882	101.923	1	Embryo 1	76	31.195	32.1212	69.8019	4	Embryo 2	7	51.8882	37.9899	68.8757	15
	Embryo 2	22	51.2704	36.1368	118.293	4	Embryo 1	77	45.0933	30.5773	93.2751	51	Embryo 2	8	46.6379	36.4453	74.4352	13
	Embryo 2	23	67.0226	36.7545	104.703	10	Embryo 1	79	40.1515	37.6807	121.69	3	Embryo 2	9	42.3139	41.0785	81.23	7
	Embryo 2	27	38.9161	37.6807	89.2603	5	Embryo 1	80	70.7289	46.3287	118.601	12	Embryo 2	10	31.5035	54.6682	85.2448	14
	Embryo 2	28	46.0202	49.4173	109.645	3	Embryo 1	81	54.0505	48.4911	81.5385	9	Embryo 2	11	27.7972	37.063	108.718	13
	Embryo 2	29	80.6123	73.1997	97.9084	6	Embryo 1	84	32.739	35.519	79.3769	58	Embryo 2	13
	Embryo 2	30	84.6271	29.3419	88.9511	76	Embryo 2	1	42.3139	52.5059	119.837	2	Embryo 2	14	34.2836	39.8431	106.247	21
	Embryo 2	32	36.7545	42.3139	75.6706	52	Embryo 2	2	48.1819	43.2401	158.135	16	Embryo 2	15	24.0909	25.9441	66.7133	15
	Embryo 2	33	45.711	38.9161	103.159	72	Embryo 2	8	58.9923	54.9767	99.7615	14	Embryo 2	16	33.9744	27.7972	59.61	25
	Embryo 2	34	63.934	45.711	72.2728	5	Embryo 2	11	55.9037	29.3419	110.88	2	Embryo 2	17	28.1064	29.6504	35.519	16
	Embryo 2	35	45.0933	33.6659	82.4655	8	Embryo 2	13	43.5494	44.1671	117.058	7	Embryo 2	18	23.1647	27.4887	48.1819	26
	Embryo 2	37	39.8431	43.8578	124.779	10	Embryo 2	15	40.7693	48.4911	110.88	5	Embryo 2	19	34.5921	27.7972	85.8625	15
	Embryo 2	38	46.3287	55.5945	94.8198	7	Embryo 2	17	47.8734	34.2836	129.72	1	Embryo 2	20	22.8555	34.5921	48.1819	34
	Embryo 2	39	60.8454	34.2836	86.4803	3	Embryo 2	18	37.063	31.195	104.703	1	Embryo 2	21	52.5059	51.8882	110.571	37
	Embryo 2	40	39.8431	41.0785	81.5385	47	Embryo 2	25	72.582	54.359	133.736	2	Embryo 2	22	79.9946	42.9316	84.9363	69
	Embryo 2	41	57.1391	54.0505	98.5261	10	Embryo 2	26	28.1064	30.2681	105.939	4	Embryo 2	23	48.1819	37.063	65.7871	69
	Embryo 2	42	55.9037	40.4608	123.235	9	Embryo 2	31	79.6854	51.8882	129.103	3	Embryo 2	24	48.4911	39.8431	71.9643	37
	Embryo 2	43	74.1259	49.7265	93.8929	12	Embryo 2	32	67.3311	64.5517	189.639	12	Embryo 2	25	47.8734	32.4305	91.1135	21
	Embryo 2	44	52.1974	47.5641	74.1259	24	Embryo 2	34	46.6379	58.3745	150.414	33	Embryo 2	26	41.387	29.3419	75.6706	20
	Embryo 2	53	32.4305	55.286	71.0374	78	Embryo 2	37	56.8299	63.3163	165.857	8	Embryo 2	27	46.0202	27.4887	86.4803	30
	Embryo 3	1	31.5035	27.4887	135.898	11	Embryo 2	38	27.1795	36.4453	110.571	1	Embryo 2	28	52.5059	42.0047	85.2448	38
	Embryo 3	2	50.3442	51.8882	89.2603	24	Embryo 2	40	60.5362	38.2984	98.8346	3	Embryo 2	29	25.6356	42.9316	78.7592	42
	Embryo 3	3	45.4025	40.1515	109.953	35	Embryo 2	43	90.4958	60.2277	128.176	28	Embryo 2	30	17.9138	46.6379	83.7009	59
	Embryo 3	7	53.1236	39.8431	100.997	8	Embryo 3	13	43.5494	37.9899	90.4958	12	Embryo 2	32	33.9744	42.6224	57.7568	34
	Embryo 3	10	42.3139	40.7693	73.1997	27	Embryo 3	15	56.5214	40.7693	108.718	21	Embryo 2	33	38.6076	33.0482	50.9619	41
	Embryo 3	13	36.4453	45.711	130.338	2	Embryo 3	22	59.9185	58.683	142.692	24	Embryo 2	35	48.7996	38.2984	40.7693	28
	Embryo 3	16	48.1819	50.3442	96.3637	63	Embryo 3	28	31.5035	31.195	103.776	38	Embryo 2	36	58.3745	30.5773	74.4352	19
	Embryo 3	18	30.8858	43.8578	69.4934	35	Embryo 3	30	47.5641	43.8578	104.703	15	Embryo 2	38	53.4328	68.5665	113.969	9
	Embryo 3	19	42.6224	45.0933	89.2603	2	Embryo 3	32	40.4608	47.2556	92.0397	12	Embryo 2	39	38.9161	32.1212	67.9488	13
	Embryo 3	24	48.1819	45.4025	113.351	32	Embryo 3	33	82.1562	44.7848	164.312	1	Embryo 2	40	27.4887	30.8858	85.8625	34
	Embryo 3	28	31.195	29.9596	67.6403	49	Embryo 3	36	54.9767	37.9899	113.969	14	Embryo 3	1	20.6939	30.8858	140.839	25
	Embryo 3	31	43.8578	41.0785	153.811	31	Embryo 3	37	53.7413	53.1236	113.969	1	Embryo 3	2	24.7086	35.2098	71.6551	22
	Embryo 3	35	44.4756	42.0047	91.1135	5	Embryo 3	39	44.7848	44.4756	193.345	4	Embryo 3	3	105.939	76.906	153.811	22
	Embryo 3	37	51.5797	41.387	105.629	2	Embryo 3	43	46.9464	59.3007	123.235	32	Embryo 3	4	64.5517	74.7437	119.528	23
	Embryo 3	39	44.4756	54.359	147.943	7	Embryo 3	45	49.7265	54.0505	154.429	26	Embryo 3	5	34.5921	49.4173	57.1391	20
	Embryo 3	41	46.3287	42.6224	98.5261	17							Embryo 3	6	81.23	43.8578	54.359	60
	Embryo 3	46	54.9767	43.5494	141.149	23							Embryo 3	7	42.6224	50.9619	48.1819	27
													Embryo 3	8	56.5214	34.2836	103.776	5
													Embryo 3	9	21.0023	42.3139	98.2169	13
													Embryo 3	10	44.4756	40.1515	128.176	30
													Embryo 3	11	41.6962	49.4173	106.865	13
													Embryo 3	12	43.2401	40.4608	98.8346	22
													Embryo 3	13	50.9619	45.4025	132.5	23
													Embryo 3	14	25.9441	25.6356	78.1415	15
													Embryo 3	15	50.6527	46.9464	80.9208	4
													Embryo 3	16	46.6379	42.9316	129.72	28
													Embryo 3	17	29.6504	31.5035	70.1111	21
													Embryo 3	18	24.0909	27.7972	79.9946	6
													Embryo 3	19	40.4608	36.7545	117.984	2
													Embryo 3	20	30.8858	42.9316	57.7568	10
		average	49.4925	47.4496	106.049			average	48.6726	40.8739	108.078			average	43.504	41.0858	87.52
		stdev	12.838	11.5774	28.723			stdev	13.4705	10.4353	30.5941			stdev	14.8351	11.1759	28.0149
		stderr	1.53443	1.38377	3.43306			stderr	1.63353	1.26547	3.71009			stderr	1.63826	1.23418	3.09373
		n(axons)=	70					n(axons)=	68					n(axons)=	83
		N(embryos)=	3					N(embryos)=	3					N(embryos)=	3

## Sheet: Figure 11A-C statistics
	Statistics (done with Graphpad Prism):
	Figure 11A
	Number of families	1
	Number of comparisons per family	3
	Alpha	0.05
	Friedman test with Dunn's multiple comparisons test	Rank sum diff.	Significant?	Summary	Adjusted P Value
	1st half vs. 2nd half	5	No	ns	>0.9999
	1st half vs. FP exit	-101	Yes	****	<0.0001
	2nd half vs. FP exit	-106	Yes	****	<0.0001
	Test details	Rank sum 1	Rank sum 2	Rank sum diff.	n1	n2
	1st half vs. 2nd half	108	103	5	70	70
	1st half vs. FP exit	108	209	-101	70	70
	2nd half vs. FP exit	103	209	-106	70	70
	Figure 11B
	Number of families	1
	Number of comparisons per family	3
	Alpha	0.05
	One-way RM ANOVA with Sidak's multiple comparisons test	Mean Diff.	95.00% CI of diff.	Significant?	Summary	Adjusted P Value
	1st half vs. 2nd half	7.799	3.875 to 11.72	Yes	****	<0.0001
	1st half vs. FP exit	-59.41	-67.71 to -51.10	Yes	****	<0.0001
	2nd half vs. FP exit	-67.2	-75.00 to -59.41	Yes	****	<0.0001
	Test details	Mean 1	Mean 2	Mean Diff.	SE of diff.	n1	n2	t	DF
	1st half vs. 2nd half	48.67	40.87	7.799	1.602	68	68	4.868	67
	1st half vs. FP exit	48.67	108.1	-59.41	3.393	68	68	17.51	67
	2nd half vs. FP exit	40.87	108.1	-67.2	3.184	68	68	21.11	67
	Figure 11C
	Number of families	1
	Number of comparisons per family	3
	Alpha	0.05
	Friedman test with Dunn's multiple comparisons test	Rank sum diff.	Significant?	Summary	Adjusted P Value
	1st half vs. 2nd half	11	No	ns	>0.9999
	1st half vs. FP exit	-110	Yes	****	<0.0001
	2nd half vs. FP exit	-121	Yes	****	<0.0001
	Test details	Rank sum 1	Rank sum 2	Rank sum diff.	n1	n2
	1st half vs. 2nd half	131	120	11	82	82
	1st half vs. FP exit	131	241	-110	82	82
	2nd half vs. FP exit	120	241	-121	82	82
